# Supplementary material
Source: MDPI journal article supplement (https://www.mdpi.com/1996-1073/14/19/6386)
Supplement: s1 [file energies-1362921-supplementary.pdf › energies-1362921-supplementary.pdf]

*Supplementary Materials*

# **Design of Feedback Control Strategies in a Plant-Wide Wastewater Treatment Plant for Simultaneous Evaluation of Economics, Energy Usage, and Removal of Nutrients**

**Abdul Gaffar Sheik<sup>1</sup>, Eagalapati Tejaswini<sup>1</sup>, Murali Mohan Seepana<sup>1</sup>, Seshagiri Rao Ambati<sup>1\*</sup>, Montse Meneses and Ramon Vilanova<sup>2\*</sup>**

<sup>1</sup> Department of Chemical Engineering, National Institute of Technology, Warangal 506 004, Telangana, India; gskabdul@student.nitw.ac.in (A.G.S.); tejaswini.e@student.nitw.ac.in (E.T.) ; murali@nitw.ac.in (M.M.S.)

<sup>2</sup> Department of Telecommunication and System Engineering, Universitat Autònoma de Barcelona, 08193 Barcelona, Spain; Montse.Meneses@uab.cat (M.M.)

\* Correspondence: seshagiri@nitw.ac.in (S.R.A.); ramon.vilanova@uab.cat (R.V.)

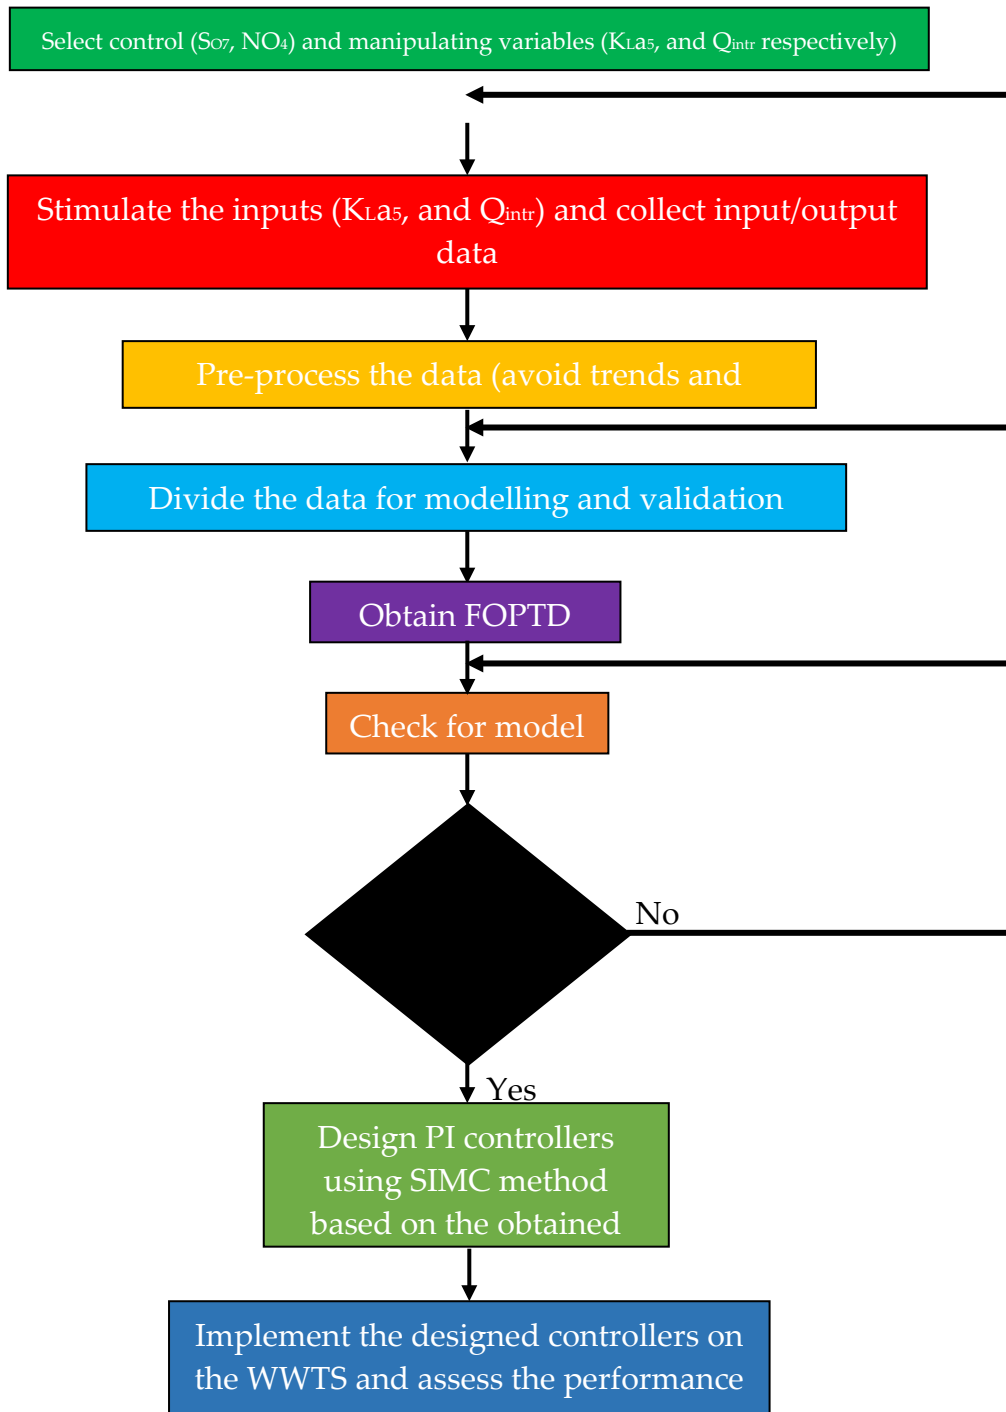

**Figure S1.** Systematic procedure for model identification and control implementation.

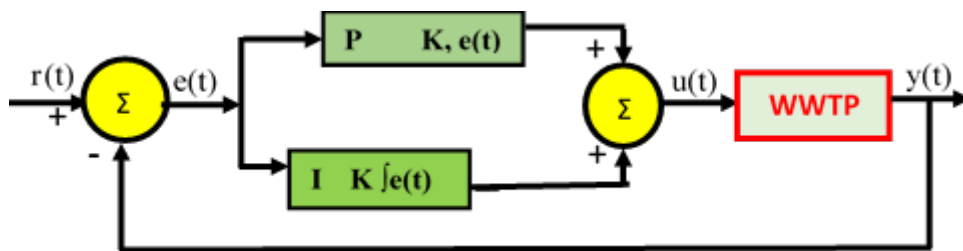

**Figure S2.** A simple PI controller in WWTP.

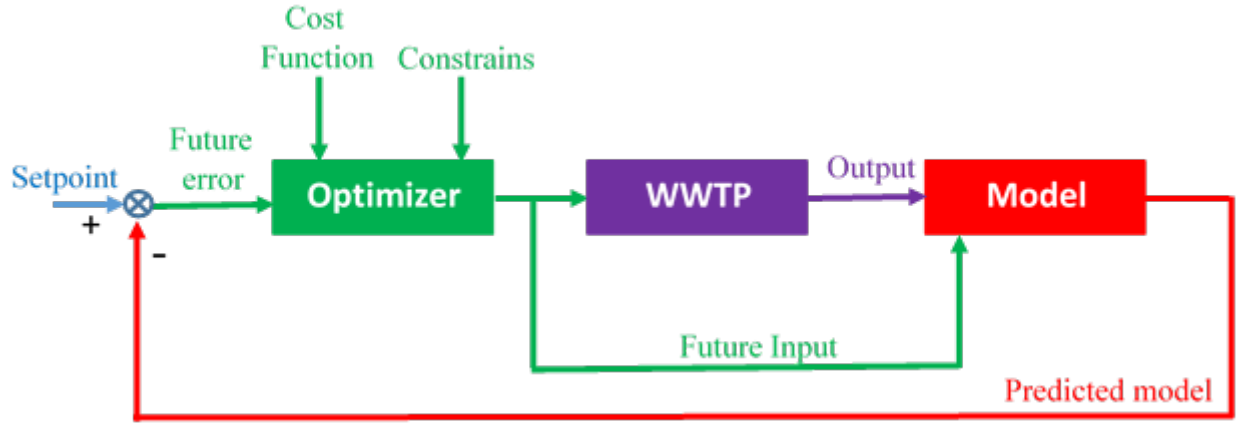

Figure S3. Model Predictive Controller scheme in WWTP.

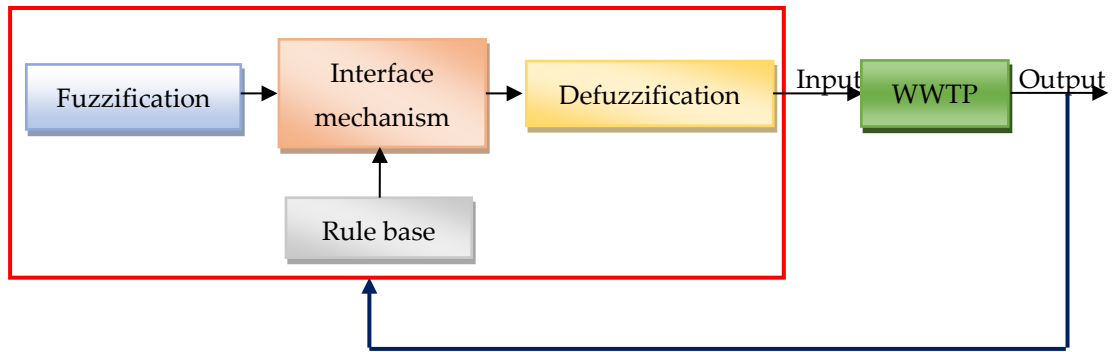

Figure S4. A classical Fuzzy controller in WWTP.

Table S1. State variables of ASM2d, units with notations, and average influent data.

| Notation  | Parameters                        | Units                                                  | Average influent data |
|-----------|-----------------------------------|--------------------------------------------------------|-----------------------|
| $S_O$     | Dissolved oxygen                  | $\text{g O}_2/\text{m}^3$                              | 0                     |
| $S_F$     | Fermentable substrate             | $\text{g}/\text{m}^3$                                  | 69.9                  |
| $S_A$     | Acetate                           | $\text{g}/\text{m}^3$                                  | 57.4                  |
| $S_I$     | Soluble inerts                    | $\text{kg}/\text{m}^3$                                 | 26.5                  |
| $S_{NH4}$ | Ammonium                          | $\text{g}/\text{m}^3$                                  | 25.1                  |
| $S_{N2}$  | Dinitrogen                        | $\text{g}/\text{m}^3$                                  | 0                     |
| $S_{NOX}$ | Nitrate plus nitrite              | $\text{g}/\text{m}^3$                                  | 0                     |
| $S_{PO4}$ | Phosphate                         | $\text{g}/\text{m}^3$                                  | 5.6                   |
| $S_I$     | Saturation index                  | $\text{kg COD}/\text{m}^3$                             | 84                    |
| $X_i$     | Inert particulate organics        | $\text{g COD}/\text{m}^3$                              | 94.09                 |
| $X_S$     | Sulfate reducing bacteria         | $\text{kg COD}/\text{m}^3$                             | 369.9                 |
| $X_H$     | Heterotrophic biomass             | $\text{g COD}/\text{m}^3$                              | 51.5                  |
| $X_{PAO}$ | Phosphorus accumulating organisms | $\text{g COD}/\text{m}^3$                              | 0                     |
| $X_{PP}$  | Polyphosphates                    | $(\text{g}/\text{m}^3) (\text{kmol}/\text{m}^3)$       | 0                     |
| $X_{PHA}$ | Polyhydroxy alkanooates           | $(\text{g COD}/\text{m}^3) (\text{kg COD}/\text{m}^3)$ | 0                     |
| $X_A$     | Autotrophic biomass               | $\text{g COD}/\text{m}^3$                              | 0                     |
| $X_{TSS}$ | Total suspended solids            | $\text{g SS}/\text{m}^3$                               | 374.6                 |
| $S_K$     | Potassium                         | $(\text{g m}/\text{m}^3) (\text{kmol}/\text{m}^3)$     | 20                    |
| $S_{Mg}$  | Magnesium                         | $(\text{g m}/\text{m}^3) (\text{kmol m}/\text{m}^3)$   | 30                    |
| $Q$       | Flow                              | $\text{m}^3/\text{d}$                                  | 20648                 |
| Temp      | Temperature                       | $^{\circ}\text{C}$                                     | 15                    |
| $S_{Na}$  | Sodium                            | $(\text{g}/\text{m}^3) (\text{kmol}/\text{m}^3)$       | 175                   |

---

|             |                                                       |                                              |      |
|-------------|-------------------------------------------------------|----------------------------------------------|------|
| $S_{Cl}$    | Chloride                                              | (g /m <sup>3</sup> ) (kmol /m <sup>3</sup> ) | 300  |
| $S_{Ca}$    | Calcium                                               | (g /m <sup>3</sup> ) (kmol /m <sup>3</sup> ) | 60   |
| $S_{SO4}$   | Sulfate                                               | (g /m <sup>3</sup> ) (kmol /m <sup>3</sup> ) | 0    |
| $S_{Fe2}$   | Iron (II)                                             | (g /m <sup>3</sup> ) (kmol /m <sup>3</sup> ) | 0    |
| $S_{Fe3}$   | Iron (III)                                            | (g /m <sup>3</sup> ) (kmol /m <sup>3</sup> ) | 0    |
| $S_{Al}$    | Alkalinity                                            | kmol/m <sup>3</sup>                          | 0    |
| $S_{Is}$    | Inorganic total sulfides                              | kg COD /m <sup>3</sup>                       | 0    |
| $X_{HFOL}$  | Hydrous ferric oxide with low number of active sites  | (g /m <sup>3</sup> ) (kmol /m <sup>3</sup> ) | 0    |
| $X_{HFOH}$  | Hydrous ferric oxide with high number of active sites | (g /m <sup>3</sup> ) (kmol /m <sup>3</sup> ) | 0    |
| $X_{HFOLP}$ | XHFO_L with bounded adsorption sites                  | g/m <sup>3</sup>                             | 0    |
| $X_{HFOHP}$ | XHFO_H with bounded adsorption sites                  | g/m <sup>3</sup>                             | 0    |
| $X_{S0}$    | Elemental sulfur                                      | (g/m <sup>3</sup> ) (kg/m <sup>3</sup> )     | 0    |
| $X_{SRB}$   | Sulfate-reducing bacteria                             | kg/m <sup>3</sup>                            | 0    |
| $X_{ISS}$   | Inorganic suspended solids                            | g SS/m <sup>3</sup>                          | 33.5 |

---
